# Supplementary material
Source: publisher figshare collection journal article supplement (https://gsajournals.figshare.com/ndownloader/files/14243780)
Supplement: Supplementary file 1 [file 14243780]

## Sheet: Table S1
	Table S1: Summary statistics of primary assembly results for each masking procedure, error correction and set of parameters tested
		CovFull 10Kb h256	CovFull 12_5Kb h256	CovFull 15Kb h128	CovFull 15Kb h256	CovFull 17_5Kb h256	CovFull 20Kb h256	CovFull 5_5Kb h256	CovFull 5Kb h512	CovFull 6_5Kb h256	CovFull 6Kb h256	CovFull 7_5Kb h256	CovFull 7Kb h256	CovFull 8_5Kb h256	CovFull 8Kb h256	CovFull 9_5Kb h256	CovFull 9Kb h256	Cov50 masked 10Kb h256	Cov50 masked 3_5Kb h256	Cov50 masked 3Kb h256	Cov50 masked 4_5Kb h256	Cov50 masked 4Kb h256	Cov50 masked 5_5Kb h256	Cov50 masked 5Kb h256	Cov50 masked 6_5Kb h256	Cov50 masked 6Kb h256	Cov50 masked 7_5Kb h256	Cov50 masked 7Kb h256	Cov50 masked 8_5Kb h256	Cov50 masked 9_5Kb h256	Cov50 masked 9Kb h256	Cov100 10Kb h256	Cov100 10Kb h512	Cov100 12_5Kb h256	Cov100 15Kb h1024	Cov100 15Kb h150	Cov100 15Kb h1536	Cov100 15Kb h256	Cov100 15Kb h512	Cov100 17_5Kb h256	Cov100 20Kb h256	Cov100 5_5Kb h256	Cov100 5Kb h256	Cov100 6_5Kb h256	Cov100 6Kb h512	Cov100 7_5Kb h256	Cov100 7Kb h256	Cov100 8_5Kb h256	Cov100 8Kb h256
	Assembly Length	641816389	633140172	609636389	609487967	506167262	292128701	633951646	609837680	636170328	635193950	640659441	639164755	637295822	639158310	638812179	638284402	463023246	559862635	560259839	559456356	559438238	554365475	557014563	547330879	550558574	535749374	542041973	515611035	485475818	501515269	638761478	638239431	628953786	582985491	583189253	583109087	583227383	583041372	447898058	225849638	637332290	636110906	639285609	638147878	640291207	639896931	641707604	640854191
	GC percentage	0.34	0.34	0.34	0.34	0.34	0.34	0.34	0.34	0.34	0.34	0.34	0.34	0.34	0.34	0.34	0.34	0.34	0.34	0.34	0.34	0.34	0.34	0.34	0.34	0.34	0.34	0.34	0.34	0.34	0.34	0.34	0.34	0.34	0.34	0.34	0.34	0.34	0.34	0.34	0.34	0.34	0.34	0.34	0.34	0.34	0.34	0.34	0.34
	Number_of_contigs	2946	2690	2967	2960	3542	3547	3237	2963	3225	3196	3178	3204	3041	3108	2954	2999	4796	6170	6147	6142	6112	5973	6016	5777	5852	5622	5677	5315	5072	5200	3379	3386	3155	3363	3368	3376	3378	3364	3738	3200	3770	3796	3685	3711	3613	3650	3574	3595
	Median contig length	82117	102791	104860	105192	83226.5	56676	69515	105229	71175	70803	73522.5	71608	78684	76311.5	80712.5	80526	55026	48557	49507	48533.5	48889	49324	49576.5	50123	50058.5	51886	50615	54409	54076.5	53641	79211	78034.5	92960	90797	91084.5	90364.5	90364.5	90811.5	75106.5	48953	65731.5	65068.5	68611	66785	69373	69356.5	72176	71403
	Average contig length	217860	235368	205472	205908	142904	82359.4	195845	205818	197262	198747	201592	199490	209568	205649	216253	212832	96543.6	90739.5	91143.6	91087	91531.1	92811.9	92588.9	94743.1	94080.4	95295.2	95480.4	97010.5	95716.8	96445.2	189039	188494	199351	173353	173156	172722	172655	173318	119823	70578	169054	167574	173483	171961	177219	175314	179549	178263
	Minimum contig length	717	194	568	568	581	482	30	568	30	30	526	526	526	526	526	526	124	88	115	536	172	208	536	208	208	208	208	190	124	174	147	147	147	349	349	524	349	349	393	246	315	197	138	138	168	315	168	168
	Maximum contig length	5655978	4270219	4504251	3681014	3045003	1256705	6077551	4504251	5822199	5822187	6671512	6671454	5432393	6671492	5602221	5602094	2103438	3534531	3785473	4332559	3534455	3033797	3255298	3439627	3648892	3255356	3170506	3254865	2579991	3670758	6134294	6134294	3286457	3371874	3371874	3371874	3371874	3371874	1847094	820654	4514498	4263057	5050202	5050107	4750480	4998988	6665466	6665472
	N10 length	2041162	2090772	1526226	1528522	784895	371998	2107049	1528522	2030065	2091822	1867947	2030056	2167831	1976386	2031017	2235198	619951	662172	659982	636980	656111	640892	620198	686286	649418	676173	691414	646465	619966	633303	1626510	1626510	1485980	1214258	1191183	1232253	1214258	1232253	648207	294573	1731689	1691955	1749279	1704672	1722146	1704657	1770736	1729878
	N20 length	1399827	1439894	992150	985622	568021	253147	1285860	985622	1379902	1379929	1347608	1425503	1406848	1411311	1379150	1429003	405934	434554	432615	420260	436746	424500	420260	443550	428044	430439	442147	435879	427453	428395	1123214	1137531	1016728	797103	782894	794344	794344	794344	445681	219926	1177735	1161938	1175982	1191564	1205381	1162016	1130395	1133523
	N30 length	957699	1007820	741296	739379	424547	203510	975870	741296	1003247	1001007	972556	983370	1035897	1036059	1027994	1035897	305879	316031	319115	314134	313736	312245	314134	325454	319154	326154	327215	318926	309234	314353	850702	863167	773021	573028	571512	573028	567277	573028	334600	178076	835534	810877	839744	872625	877031	858990	866657	850128
	N40 length	763870	753303	548638	548638	337222	167678	715792	552222	742362	744435	754847	741782	792979	760793	780524	769899	235191	233886	231712	239001	233700	239832	238360	244257	245220	243913	248124	243945	237770	244983	625740	626905	615860	450815	450815	450973	450973	451618	250019	139370	606467	588053	607344	634741	624179	605898	627362	638423
	N50 length	568267	536847	420990	426408	257720	136270	563945	427118	570292	561506	586708	572285	580515	584431	579252	561720	185107	183500	179484	184444	182898	189333	185291	192921	192821	190808	194198	191801	186997	192027	450706	453090	441083	336493	336493	336493	336493	336689	199030	112312	449651	438609	447552	454828	452235	445231	454970	452235
	N60 length	411938	400022	310872	309753	196112	105084	394841	308968	398886	399189	397534	400204	408122	410488	409049	403241	140826	135307	135307	138872	139738	142462	140066	146696	145031	145782	148975	145636	139325	145158	336216	337515	324548	253348	252609	253348	252936	253473	158831	91685	321883	320992	325574	321870	326505	319772	333769	339468
	N70 length	293518	289109	226909	226875	149132	82330	274446	225875	268398	277021	270525	274589	275932	274922	294175	283638	104956	99066	99435	101541	100736	102182	101646	105574	103049	107151	108672	107509	104766	107150	242405	241249	226523	185548	184314	184314	185345	185548	118668	72635	214387	214173	218269	214070	224554	223836	226622	227533
	N80 length	197419	194311	154441	154441	105528	63273	175482	154828	170835	178541	181222	178318	188624	186691	198589	194757	76109	70436	70214	71302	71466	72444	72702	73745	73660	74464	74359	75268	75018	75737	156139	155155	154582	128456	126710	126538	127352	128112	87603	55718	135139	134069	140552	138555	148005	144183	147030	149536
	N90 length	101402	107843	92163	92196	67173	42619	86761	92244	89102	89357	92272	91059	97249	97540	101907	99188	47767	42486	43270	43169	42981	43900	43563	44671	44585	45857	45344	47977	47886	47734	85109	84649	87875	77432	76976	76851	76942	77387	59010	34941	73131	71917	76050	74273	76736	75897	80565	78522
	N10 index	23	22	30	30	48	54	21	30	21	22	23	22	20	21	21	20	54	55	53	55	55	56	55	53	54	54	52	55	54	55	26	26	32	34	35	34	34	34	49	54	27	29	25	26	25	25	24	24
	N20 index	61	60	81	81	126	153	61	81	59	60	63	60	58	61	60	58	147	161	158	165	162	163	166	154	161	156	153	154	150	153	75	74	84	95	96	95	96	96	135	144	73	74	70	72	71	71	70	71
	N30 index	116	112	152	153	229	281	118	153	114	115	119	116	111	114	115	111	279	315	311	322	317	317	321	300	312	299	296	293	283	290	141	139	155	181	183	182	183	182	253	259	137	141	136	134	132	135	134	136
	N40 index	193	184	248	248	364	439	195	248	190	190	195	192	182	188	188	183	453	523	519	527	525	519	526	494	508	492	487	479	463	472	230	227	246	297	299	298	299	298	410	402	227	234	225	220	219	224	222	223
	N50 index	291	285	374	374	537	632	295	373	288	289	293	290	276	285	283	281	677	792	794	795	795	780	793	745	760	739	733	716	695	704	350	346	367	447	448	447	448	447	611	583	350	361	347	339	340	347	344	345
	N60 index	421	422	541	541	764	878	429	541	421	422	424	422	406	415	412	413	962	1149	1154	1146	1145	1118	1141	1073	1090	1064	1054	1026	994	1004	515	510	533	646	648	646	648	646	864	808	517	530	514	504	506	516	509	509
	N70 index	605	608	771	771	1062	1192	621	772	614	613	617	613	597	608	596	601	1343	1631	1635	1618	1617	1578	1609	1513	1540	1491	1481	1438	1397	1405	738	732	765	917	920	918	919	916	1191	1085	759	771	752	745	741	755	739	738
	N80 index	871	875	1096	1095	1463	1599	909	1097	910	900	905	900	874	890	862	872	1864	2302	2310	2279	2279	2225	2259	2137	2173	2091	2085	2008	1946	1959	1068	1065	1101	1295	1302	1299	1300	1295	1635	1439	1130	1145	1114	1113	1090	1110	1089	1085
	N90 index	1325	1312	1603	1601	2061	2149	1425	1604	1426	1404	1406	1406	1347	1368	1314	1335	2624	3294	3300	3265	3261	3188	3230	3066	3115	2988	2993	2847	2748	2777	1621	1621	1628	1881	1889	1889	1888	1880	2255	1937	1770	1791	1729	1736	1696	1723	1682	1683
	Number of contigs >= 100bp	2946	2690	2967	2960	3542	3547	3236	2963	3224	3195	3178	3204	3041	3108	2954	2999	4796	6169	6147	6142	6112	5973	6016	5777	5852	5622	5677	5315	5072	5200	3379	3386	3155	3363	3368	3376	3378	3364	3738	3200	3770	3796	3685	3711	3613	3650	3574	3595
	Average length of contigs >= 100bp	217860	235368	205472	205908	142904	82359.4	195906	205818	197323	198809	201592	199490	209568	205649	216253	212832	96543.6	90754.2	91143.6	91087	91531.1	92811.9	92588.9	94743.1	94080.4	95295.2	95480.4	97010.5	95716.8	96445.2	189039	188494	199351	173353	173156	172722	172655	173318	119823	70578	169054	167574	173483	171961	177219	175314	179549	178263
	N50 contigs >= 100bp	568267	536847	420990	426408	257720	136270	563945	427118	570292	561506	586708	572285	580515	584431	579252	561720	185107	183500	179484	184444	182898	189333	185291	192921	192821	190808	194198	191801	186997	192027	450706	453090	441083	336493	336493	336493	336493	336689	199030	112312	449651	438609	447552	454828	452235	445231	454970	452235
	A content	210272320	207410276	199949869	199859237	166097767	95898959	207842085	200010030	208435993	208168512	209899341	209438179	208843257	209456459	209248453	209069528	151866581	183816182	183965691	183638525	183593258	181904067	182775149	179602402	180657970	175750905	177865609	169165998	159296626	164509503	209248800	209055509	206037553	191028903	191102986	191062393	191097940	191032804	147019917	74100507	208979572	208636074	209515204	209121391	209806592	209752503	210168211	209860488
	C content	110687901	109216681	105046116	105006523	87106632	50193964	109156486	105071487	109563038	109371459	110314301	110074323	109785116	110060283	110151021	109969734	79533931	96170383	96206709	96098952	96119658	95279954	95689169	94008690	94598152	91994991	93116060	88516193	83345972	86098426	110094297	109982658	108289717	100299876	100349775	100329429	100336154	100297851	76997673	38800513	109763411	109561467	110092550	109953081	110243644	110246574	110529152	110373356
	T content	210202362	207408348	199772857	199757826	165979842	95820492	207704111	199846144	208542018	208187141	209984962	209464122	208823147	209453278	209275710	209235973	152090289	183721604	183856072	183575676	183564394	181951700	182820005	179647277	180718660	175902639	177882012	169269261	159370029	164709183	209312127	209163995	206258308	191234581	191280013	191266889	191324174	191264013	146865961	74111039	208837120	208382701	209586329	209194471	209911393	209684690	210407334	210143709
	G content	110653806	109104867	104867547	104864381	86983021	50215286	109248964	104910019	109629279	109466838	110460837	110188131	109844302	110188290	110136995	110009167	79532445	96154466	96231367	96143203	96160928	95229754	95730240	94072510	94583792	92100839	93178292	88659583	83463191	86198157	110106254	110037269	108368208	100422131	100456479	100450376	100469115	100446704	77014507	38837579	109752187	109530664	110091526	109878935	110329578	110213164	110602907	110476638
	Cumulative length of contigs
	Contigs >100bp	641816389	633140172	609636389	609487967	506167262	292128701	633951616	609837680	636170298	635193920	640659441	639164755	637295822	639158310	638812179	638284402	463023246	559862547	560259839	559456356	559438238	554365475	557014563	547330879	550558574	535749374	542041973	515611035	485475818	501515269	638761478	638239431	628953786	582985491	583189253	583109087	583227383	583041372	447898058	225849638	637332290	636110906	639285609	638147878	640291207	639896931	641707604	640854191
	Contigs >200bp	641816389	633139978	609636389	609487967	506167262	292128701	633951616	609837680	636170298	635193920	640659441	639164755	637295822	639158310	638812179	638284402	463022758	559862547	560259552	559456356	559438066	554365475	557014563	547330879	550558574	535749374	542041973	515610845	485475520	501515095	638761163	638239116	628953639	582985491	583189253	583109087	583227383	583041372	447898058	225849638	637332290	636110709	639285471	638147740	640291039	639896931	641707436	640854023
	Contigs >500bp	641816389	633139978	609636389	609487967	506167262	292128219	633951616	609837680	636170298	635193920	640659441	639164755	637295822	639158310	638812179	638284402	463021742	559862297	560259552	559456356	559438066	554365267	557014563	547330304	550557999	535748373	542040972	515610637	485475051	501515095	638760848	638238801	628953639	582985142	583188904	583109087	583227034	583041023	447897665	225849012	637331553	636109972	639285156	638147003	640290724	639896616	641707121	640853322
	Contigs >1Kbp	641815672	633137827	609633467	609485045	506164407	292122619	633951072	609834758	636169772	635193394	640658915	639164229	637294499	639157784	638811003	638283876	463015903	559855410	560251989	559449241	559430250	554359635	557009856	547324638	550550142	535743404	542036029	515604317	485470366	501508538	638759863	638237816	628951240	582981518	583185280	583105463	583223410	583037399	447894304	225841450	637328433	636107610	639282794	638143883	640289868	639895239	641705323	640852466
	Contigs >2Kbp	641805032	633131367	609628340	609479918	506157479	292097103	633940943	609829631	636157777	635182776	640644800	639152234	637286316	639145314	638804347	638271958	462962768	559830000	560225770	559413844	559399582	554332097	556977870	547295929	550514514	535701006	542001964	515554875	485431172	501447783	638752154	638230107	628944182	582970770	583174532	583094715	583212662	583026651	447890734	225824252	637318925	636100427	639271002	638133204	640283071	639885102	641693400	640847226
	Contigs >5Kbp	641660719	633035905	609497775	609357754	505998966	291772627	633769256	609694684	635965059	635006028	640447224	638954520	637140323	638970141	638659348	638126786	462479515	559206607	559615426	558764230	558769294	553745192	556364721	546733020	549946561	535121906	541411346	514969960	484854652	500812669	638578173	638050341	628827968	582853644	583061785	582984210	583095536	582909525	447695137	225453730	637142932	635919674	639089945	637960600	640084753	639691845	641520104	640656349
	Contigs >10Kbp	640751952	632293366	608966578	608818562	505124097	290573405	632830411	609173011	635067716	634074050	639537409	638044569	636146766	637950101	637711083	637117528	460216054	555381116	555852274	555089185	555024202	550038210	552849448	543177403	546279089	531854157	537960873	512136019	482130857	498132612	637683871	637150065	627933274	582053956	582270770	582166804	582270777	582100266	446755847	224076726	636185884	634879025	638056418	637002638	639065149	638641800	640388802	639568621
	Contigs >20Kbp	635960122	629263299	606285212	606181366	501393302	284687946	626889443	606531714	628897407	628279346	633545226	631790464	630632184	631802468	632585704	632073173	450864769	541889081	542678763	541362679	541729993	536805490	539700069	530912099	533659375	520176408	525955088	501360127	472465461	488014382	632226613	631667909	624569193	578945570	579229848	579089319	579135130	579013029	441782666	217817732	629377038	628419986	631432430	630247021	632948468	632560295	634439280	633370235
	Contigs >50Kbp	616815268	614301724	589920297	589880509	479305226	254666572	602528332	590299513	605365278	604574026	611674756	608799413	610846346	612031675	613371644	612279099	413561977	492001150	493105393	492029075	492146030	488462203	490636463	484549021	486714034	476939472	481429436	461964658	434227002	448409452	608866171	608075952	606145522	559308715	559320147	559202526	559524827	559285577	417388511	188281043	599170354	596779517	603269947	601091036	604863247	604620730	608999617	606748254
	Contigs >100Kbp	578654962	576390944	541685733	541701612	411755581	181998324	559189367	541827371	562463817	562851819	569358667	567337397	570541802	572300593	575835583	573755207	330912347	390376531	390979641	394111145	392920128	391562022	392537395	390744927	391075626	386880107	391805768	374173534	345661561	362188411	560874559	559660294	555044906	497755123	497604741	497036050	497342131	497864357	336723881	124806370	543221998	541728667	550339525	547003489	552802912	551425016	556632320	554162574
	Contigs >200Kbp	511367256	501993500	448062348	448407647	297843644	89785199	491432210	447969926	488213972	492443059	499098028	495958791	499786657	500558501	508932008	506026137	215476743	260764654	254936666	261157552	260130009	264482914	259553663	266024519	268460225	258502705	264608146	248848966	226971896	241102719	474086449	472653189	462617846	392973821	391738161	392160120	392737603	393527461	223025931	54831383	458527991	456159239	462118969	459067311	467958511	465038404	469730256	471336715
	Contigs >500Kbp	353750102	332542052	268020532	267397681	124138085	15906606	339138014	269015116	343934122	340871887	349423734	347357392	349050065	350037151	352899964	348013820	67663014	89256740	90191786	82712071	86486374	87550416	80217439	90906733	85418747	83948074	89002193	84227934	77168088	78682115	303302859	303920681	290996040	205390018	205765437	204814084	205754389	206100359	69977855	5976626	294412090	284603086	299455471	304188906	304418564	299400447	299557942	298060149
	Contigs >1Mbp	188685890	192519044	120033952	118451703	22574925	3323373	183880112	119045406	190916327	190942351	187363977	188051785	199051491	196372475	195378744	199417099	14150958	26752160	28831608	25222479	24658042	26377649	24027357	25620054	23391371	19919051	28784189	18868352	12323326	14215797	152158065	151396118	131431084	79867065	79065190	79514362	79377531	79427757	18573373	0	157908443	149131914	157345609	166917972	170777069	163019597	158145160	156812010
	Contigs >2Mbp	71675459	67738806	28682639	27854220	5230650	0	68383240	26579495	67064985	68075138	62067374	65599435	75190897	62450183	68003017	71127520	2103438	10338866	10743955	14173787	11048991	11629077	14488998	11008224	11217345	7635260	7555545	7694915	7084770	6250752	47313767	47598355	32383514	15207088	15187330	15187330	15180806	13134299	0	0	47687301	43365283	47493588	42431967	51366627	48490959	54787261	53612624
	Contigs >5Mbp	5655978	0	0	0	0	0	16301745	0	16042955	10933573	11796348	11783235	10551713	11790741	10720350	10732411	0	0	0	0	0	0	0	0	0	0	0	0	0	0	6134294	6134294	0	0	0	0	0	0	0	0	0	0	5050202	5050107	0	0	6665466	6665472
	Contigs >10Mbp	0	0	0	0	0	0	0	0	0	0	0	0	0	0	0	0	0	0	0	0	0	0	0	0	0	0	0	0	0	0	0	0	0	0	0	0	0	0	0	0	0	0	0	0	0	0	0	0
	Number of contigs
	Contigs >100bp	2946	2690	2967	2960	3542	3547	3236	2963	3224	3195	3178	3204	3041	3108	2954	2999	4796	6169	6147	6142	6112	5973	6016	5777	5852	5622	5677	5315	5072	5200	3379	3386	3155	3363	3368	3376	3378	3364	3738	3200	3770	3796	3685	3711	3613	3650	3574	3595
	Contigs >200bp	2946	2689	2967	2960	3542	3547	3236	2963	3224	3195	3178	3204	3041	3108	2954	2999	4793	6169	6145	6142	6111	5973	6016	5777	5852	5622	5677	5314	5070	5199	3377	3384	3154	3363	3368	3376	3378	3364	3738	3200	3770	3795	3684	3710	3612	3650	3573	3594
	Contigs >500bp	2946	2689	2967	2960	3542	3546	3236	2963	3224	3195	3178	3204	3041	3108	2954	2999	4790	6168	6145	6142	6111	5972	6016	5775	5850	5619	5674	5313	5069	5199	3376	3383	3154	3362	3367	3376	3377	3363	3737	3198	3768	3793	3683	3708	3611	3649	3572	3592
	Contigs >1Kbp	2945	2685	2963	2956	3538	3539	3235	2959	3223	3194	3177	3203	3039	3107	2952	2998	4783	6159	6135	6133	6101	5965	6010	5768	5840	5613	5668	5305	5063	5191	3375	3382	3151	3357	3362	3371	3372	3358	3733	3188	3764	3790	3680	3704	3610	3647	3570	3591
	Contigs >2Kbp	2939	2681	2960	2953	3533	3522	3229	2956	3216	3188	3169	3196	3034	3100	2948	2991	4749	6141	6117	6108	6080	5945	5987	5747	5815	5584	5644	5272	5037	5151	3370	3377	3146	3351	3356	3365	3366	3352	3730	3176	3758	3785	3672	3697	3605	3640	3562	3587
	Contigs >5Kbp	2901	2656	2924	2919	3489	3432	3182	2919	3163	3140	3116	3142	2992	3052	2908	2950	4611	5967	5944	5932	5906	5788	5822	5598	5665	5428	5488	5104	4874	4967	3323	3329	3112	3318	3324	3334	3333	3319	3676	3076	3710	3736	3622	3650	3552	3586	3514	3536
	Contigs >10Kbp	2782	2556	2854	2848	3371	3269	3060	2850	3048	3020	2998	3025	2864	2918	2785	2820	4313	5470	5453	5451	5419	5309	5364	5134	5189	4999	5040	4732	4517	4616	3206	3211	2998	3217	3224	3231	3229	3217	3551	2894	3587	3601	3488	3527	3422	3451	3370	3398
	Contigs >20Kbp	2472	2357	2677	2674	3125	2878	2679	2676	2653	2646	2613	2622	2501	2519	2456	2490	3683	4561	4566	4522	4521	4416	4477	4300	4339	4209	4224	4007	3863	3929	2850	2854	2777	3012	3024	3028	3022	3013	3228	2478	3144	3185	3062	3088	3026	3056	2983	2996
	Contigs >50Kbp	1866	1903	2194	2193	2470	1971	1905	2197	1908	1887	1913	1894	1867	1885	1842	1858	2559	3037	3060	3018	3016	2964	2999	2895	2928	2878	2858	2804	2692	2716	2137	2134	2222	2434	2440	2441	2444	2432	2517	1581	2189	2193	2178	2169	2152	2185	2180	2156
	Contigs >100Kbp	1335	1375	1529	1529	1529	943	1303	1530	1319	1310	1330	1323	1316	1338	1322	1327	1409	1615	1622	1642	1630	1612	1635	1586	1595	1605	1599	1565	1453	1512	1468	1460	1510	1574	1579	1572	1574	1574	1404	695	1418	1429	1443	1423	1429	1443	1449	1428
	Contigs >200Kbp	860	852	870	872	734	291	825	870	797	816	834	818	822	834	851	848	593	692	661	698	692	714	694	706	725	690	700	670	613	654	859	849	870	838	834	834	838	840	606	190	818	823	821	804	833	835	835	844
	Contigs >500Kbp	352	316	293	292	168	22	336	295	336	332	346	341	332	341	345	335	92	112	111	102	108	112	98	114	107	105	111	113	106	106	316	314	316	238	240	237	240	240	93	9	298	289	304	307	306	303	299	298
	Contigs >1Mbp	112	114	79	77	16	3	111	78	114	115	114	112	118	118	118	118	11	17	18	14	14	17	13	16	13	12	20	12	7	8	98	96	89	53	53	53	53	53	15	0	100	94	97	107	109	103	97	97
	Contigs >2Mbp	26	24	10	10	2	0	23	9	22	24	21	22	25	20	23	23	1	4	4	5	4	5	6	4	4	3	3	3	3	2	16	16	14	6	6	6	6	5	0	0	18	17	16	14	18	16	19	18
	Contigs >5Mbp	1	0	0	0	0	0	3	0	3	2	2	2	2	2	2	2	0	0	0	0	0	0	0	0	0	0	0	0	0	0	1	1	0	0	0	0	0	0	0	0	0	0	1	1	0	0	1	1
	Contigs >10Mbp	0	0	0	0	0	0	0	0	0	0	0	0	0	0	0	0	0	0	0	0	0	0	0	0	0	0	0	0	0	0	0	0	0	0	0	0	0	0	0	0	0	0	0	0	0	0	0	0
	NG length (Based on 480Mbp genome size
	0	5655978	4270219	4504251	3681014	3045003	1256705	6077551	4504251	5822199	5822187	6671512	6671454	5432393	6671492	5602221	5602094	2103438	3534531	3785473	4332559	3534455	3033797	3255298	3439627	3648892	3255356	3170506	3254865	2579991	3670758	6134294	6134294	3286457	3371874	3371874	3371874	3371874	3371874	1847094	820654	4514498	4263057	5050202	5050107	4750480	4998988	6665466	6665472
	1	5655978	4190110	3570151	3570151	2185647	878863	6077551	3570151	5822199	5822187	6671512	6671454	5432393	6671492	5602221	5602094	1402616	2399659	2399608	3255298	2914900	2242433	2363937	3255371	3255348	2246871	2216064	2244954	2384928	2579994	6134294	6134294	2699069	3085298	3085298	3085298	3085298	3085298	1445870	571562	4283466	3858541	5050202	5050107	4520083	4998988	6665466	6665472
	2	3372014	3859238	3521603	3521603	1462494	675075	5112452	3521603	5111370	5111386	5124836	5111781	5119320	5119249	5118129	5130317	1174890	2040663	2194887	2242635	2235612	2100614	2242607	2115702	2115639	1519941	1692157	1442448	1227762	1442435	4898974	4898974	2331447	2244240	2244240	2244240	2244240	2244240	1159155	437281	3156546	3156567	3719545	4283471	3755811	4511802	4298126	4045657
	3	3296898	3675357	3089257	2757375	1125367	505464	5111742	3089257	5109386	4506651	4101657	4506682	4497967	4492874	4979339	4497980	986665	1411402	1411406	1521900	1686224	1505822	2083765	1521239	1563999	1400377	1406440	1252542	986736	986842	3622891	3622891	2280461	2072789	2046507	2046507	2046507	1991280	1039888	366874	2970857	2873834	3686087	3959610	3599808	3774239	3794019	3764005
	4	3295174	3440449	2545961	2371865	1044477	453646	4486127	2545961	4473833	4108429	3460797	4101641	3858913	4101673	3296938	4439698	908865	1289452	1310066	1296159	1316995	1181292	1436503	1076584	1164206	1015754	1196438	998589	918874	898018	3199400	3199400	2156951	1841032	1787820	1787820	1809405	1809405	983410	318604	2849130	2543411	3173423	2929948	3341087	3719554	3200613	3323209
	5	3207968	3233764	2217803	2097962	991460	419433	4084967	2217803	4393431	3078025	3267887	3267899	3421209	3718628	3295172	3292102	843036	1066263	1175535	1041673	1039283	1055866	1107770	1005804	996827	966917	1046509	885493	848653	867538	2685466	2921708	2088005	1753228	1742263	1744244	1742263	1742263	909956	287203	2595032	2276532	2970885	2767529	2950544	3142027	2935258	3208585
	6	3007615	3224249	1944284	1944284	956740	378865	3109660	1827127	3267895	2982692	3237994	3085011	3292119	3251294	3251269	3251281	757012	972632	1018003	941919	953769	955524	884492	957205	932239	880423	998566	808151	778958	809619	2542776	2542776	2061330	1710476	1695298	1695298	1695298	1695298	784229	267379	2470988	2193635	2797721	2646396	2939310	2934849	2697480	2939268
	7	2877915	2846180	1820261	1820261	920444	342341	3082564	1779190	3084795	2646647	2895405	2808899	3144022	3087442	2994973	3132005	717111	888249	961066	823191	865884	826552	826553	869853	839107	846676	924579	760433	726219	763021	2361801	2361801	1920786	1672583	1659721	1659721	1659721	1659721	728370	254410	2157074	2077055	2646480	2371846	2411842	2405772	2606526	2697465
	8	2799290	2670532	1727324	1778837	873799	319254	2476613	1754728	2808892	2395601	2553646	2688706	3132011	2895408	2726986	3081206	670407	803594	805987	796562	770068	759746	771113	817493	794238	808660	844450	733690	707302	724819	2325979	2325979	1860660	1602584	1564684	1564684	1564684	1564684	685699	233340	2060487	2050311	2504404	2079451	2347723	2300064	2310782	2389992
	9	2594351	2520198	1687824	1700299	846746	292362	2347835	1695064	2395547	2347849	2368630	2524583	2895406	2613918	2536076	2853714	643556	741310	782854	734108	724555	739801	742245	742561	724643	742307	790347	683240	652547	681154	2193803	2193803	1829485	1491738	1491738	1491738	1491738	1491738	661660	222736	2050296	2041019	2274544	1993162	2106980	2037102	2203812	2209071
	10	2536139	2458114	1673736	1679232	796749	278186	2274533	1678996	2347898	2298528	2230073	2347920	2834507	2347827	2520750	2790329	612608	716479	745702	691921	691921	695401	697926	721189	690770	702137	731470	665609	619966	642930	1881154	1881154	1773218	1403328	1355739	1403328	1403328	1403328	631541	212351	1993189	1897117	1975771	1918002	2037152	2029683	2171332	2114764
	11	2277685	2309618	1618920	1618920	773200	263597	2234389	1618920	2233612	2271259	2137133	2280229	2524217	2130250	2354454	2524662	580189	679201	683732	662184	666498	660912	637040	695120	660153	682710	716600	634358	593330	614544	1733950	1771970	1639490	1307766	1300306	1307766	1307766	1307766	603797	203317	1920350	1816240	1912074	1901239	1993078	1918043	2019014	2037156
	12	2157783	2122898	1558436	1558436	736976	254412	2202375	1558436	2092010	2188833	2033857	2080592	2473044	2080636	2277695	2447589	541847	656111	656111	629907	647438	635685	615786	667404	643717	651250	666273	609334	568395	579180	1672189	1674078	1555418	1276682	1205577	1232253	1214258	1232253	577553	195547	1897083	1760481	1891474	1821501	1860493	1848816	1917894	1964689
	13	2055698	2090772	1518446	1526226	703080	249422	2107049	1526226	2069929	2091822	1888980	2033934	2235213	2023221	2031017	2241699	522835	630218	636462	612631	627994	612971	585639	657674	612713	639302	644989	583640	547801	559010	1639856	1664257	1485980	1185243	1172135	1185243	1172135	1185243	541463	185968	1775732	1733787	1775785	1721938	1826849	1722016	1852290	1837061
	14	2026554	2038832	1443523	1456180	673082	240139	2030046	1456180	1897575	2024816	1864340	1997122	2062466	1872772	2025135	2030473	501686	605552	623453	565302	595150	583167	571050	617969	578907	597250	607404	564685	532147	542521	1616057	1616057	1408063	1120886	1106005	1106405	1106005	1106005	515830	178352	1691927	1603994	1721951	1671885	1704657	1664297	1745036	1717998
	15	1948605	1905415	1360293	1385342	666973	231469	1980892	1385342	1869774	1904919	1860145	1864322	2035115	1812838	1889419	1937751	482293	580352	591025	545478	565302	566835	547182	594001	557754	579911	580734	550596	523252	525613	1563556	1575298	1361780	1055833	1053667	1055833	1055833	1055833	490138	170641	1631688	1592067	1664282	1592067	1618891	1587872	1704681	1678434
	16	1864914	1880014	1326420	1336546	644586	219898	1884302	1326026	1806344	1870354	1777293	1839571	1864856	1777293	1864856	1866992	473743	562476	569453	516974	534271	547182	518463	571293	532307	566484	557706	528251	500265	504818	1491862	1494251	1339097	1034821	1026142	1026142	1026142	1026142	482430	162988	1545816	1545816	1587872	1531063	1545711	1522175	1672177	1522170
	17	1852838	1811284	1285367	1306935	624857	213029	1829905	1303187	1798743	1841076	1724679	1777509	1834414	1724718	1771954	1818630	455473	536597	546814	504481	516825	524778	498491	549556	516935	516967	536221	514676	481283	491724	1391025	1429191	1307369	991432	989564	989564	989564	989564	466698	155532	1515761	1515763	1545816	1481437	1489853	1491340	1598019	1498967
	18	1771950	1794424	1262684	1270133	616968	205877	1709861	1262684	1756214	1786230	1678748	1748592	1771949	1666315	1766205	1771949	438379	504519	515820	491768	501487	504478	487552	516962	495999	490809	515324	493589	466788	471372	1354730	1371441	1293863	975130	967053	975130	967053	967053	455878	146328	1476320	1476300	1522155	1457704	1481443	1481445	1501004	1474613
	19	1674573	1754165	1150507	1205795	606705	197635	1671029	1150507	1724727	1724735	1635472	1682040	1756256	1646644	1680423	1719082	413544	497765	495905	487506	493443	487552	479698	499466	478850	475128	491882	476738	440890	454933	1291395	1311250	1266840	959006	953650	959006	953650	953650	442427	138295	1426089	1435804	1476161	1429070	1453145	1427169	1481482	1427155
	20	1648718	1680173	1123761	1130985	586712	192726	1578436	1126904	1653966	1686160	1566686	1666306	1680112	1581130	1634315	1653988	398493	487506	490556	475328	487111	472707	466620	485150	458447	458339	480353	458929	428061	440545	1261014	1274182	1217443	911758	907873	907873	907873	907873	428669	132263	1400471	1411910	1427110	1404722	1426101	1381470	1457724	1381458
	21	1600047	1626105	1087568	1117836	571771	188056	1529182	1082490	1607279	1607281	1532678	1623098	1598275	1565622	1580814	1613825	386569	477477	478779	464956	478611	453846	448754	469674	447635	440184	465551	441755	415820	428353	1245188	1261014	1186546	865178	854787	858480	858480	858480	408742	125571	1383848	1383833	1398193	1386039	1378289	1340696	1427155	1352743
	22	1566741	1582685	1044471	1057904	556579	182489	1506740	1043229	1554168	1570652	1506978	1562348	1576614	1526724	1556041	1576558	376393	464879	464879	441501	461460	441609	439753	453832	437846	432138	449571	423479	403810	415123	1227430	1247325	1147740	832269	818299	818299	818299	818299	396315	119463	1297117	1325043	1356833	1338553	1356140	1314510	1356167	1266748
	23	1551648	1534198	1031472	1035881	542840	175041	1452713	1022756	1515098	1559952	1476039	1523539	1526713	1519949	1520827	1556006	363760	440470	438187	424494	439813	424558	423403	443106	426960	419700	438686	415052	393921	399036	1185800	1227430	1132798	811109	804878	804878	809293	804878	379865	114260	1268576	1279243	1314510	1290066	1314803	1274080	1272633	1247697
	24	1519619	1491961	1011215	1011215	527372	170079	1362389	1005686	1486540	1508704	1456855	1506714	1519613	1479545	1481111	1519613	350378	417036	420209	410933	424426	411500	411192	426988	415120	408797	430727	398412	386483	394093	1162810	1185800	1089455	800802	797103	797103	799153	799153	368710	109323	1236626	1241137	1259846	1256474	1277677	1237172	1244448	1220077
	25	1487877	1483537	1003041	996530	510522	164426	1328911	996530	1445753	1418993	1425776	1469133	1488472	1466871	1440537	1488458	342680	404157	409583	399676	410902	401448	401448	415612	404007	401885	417741	393402	370512	387599	1144205	1161904	1042565	782413	775157	775157	775600	775600	355553	105600	1206795	1187289	1237169	1242519	1259970	1211946	1169486	1189969
	26	1409975	1445309	977661	970830	498875	159237	1301133	970830	1389248	1402111	1364621	1436972	1437838	1429020	1399811	1458786	334557	395567	397926	388039	398141	386202	391609	403429	393700	398102	403723	385392	357752	372211	1130442	1144205	1021153	758077	752747	755606	753989	753989	348672	100057	1189237	1166880	1195701	1210124	1232013	1189675	1145527	1145544
	27	1398520	1416640	954147	940273	472270	153338	1265059	940273	1350412	1362269	1331252	1388514	1406788	1393417	1374588	1406780	323559	386202	389734	370871	384014	375403	376955	395288	383160	390015	394561	374520	348164	362261	1111122	1128203	1005218	730200	728023	734406	722182	722182	341192	95767	1169065	1134744	1157479	1182953	1202575	1154657	1128280	1119773
	28	1358354	1393508	927018	923551	460525	147799	1221054	923551	1318618	1320617	1313851	1356200	1368419	1347604	1331839	1365970	312358	371602	379321	358754	369510	367613	363947	383160	377017	372561	383722	362689	331152	348498	1082640	1110015	986521	714552	714303	716891	709911	709911	334600	92235	1139951	1125104	1134744	1166813	1189362	1133551	1110034	1106232
	29	1332807	1372180	921448	919338	449265	143005	1184129	919338	1294318	1304568	1290659	1251829	1331213	1325948	1315343	1348054	305820	363851	368488	352099	359759	359438	354337	370213	365277	364741	368346	352038	319908	337979	1070334	1074940	967440	698819	694073	698819	694073	694073	322453	88745	1126614	1100362	1106844	1134703	1161216	1116584	1093518	1072803
	30	1315343	1348786	913290	907948	438478	138670	1175839	912682	1245400	1250648	1220320	1202499	1307361	1312132	1289864	1315893	293311	352383	359350	346688	351143	349796	348904	358985	353506	354378	358132	337171	312070	328023	1035848	1055380	949004	685961	681726	685844	682757	685844	310085	84350	1104939	1059104	1072791	1117977	1128280	1094332	1073455	1065643
	31	1262482	1316827	890039	870825	430837	132991	1158500	875315	1202584	1184135	1184139	1183063	1262612	1290625	1227893	1294058	284441	344746	347607	341827	344096	339773	343847	351873	346433	346102	351158	331229	305157	318924	1020194	1021253	930001	674344	674196	674344	674196	674344	302312	79638	1064659	1013215	1050304	1103298	1106933	1073700	1061705	1034745
	32	1182353	1283771	862995	837810	422978	126606	1139817	845846	1183040	1175837	1168984	1169196	1229740	1240157	1202717	1267559	276702	337432	338256	335912	334909	331731	334673	341022	338522	336376	341306	321801	294760	308598	992860	991607	899606	659965	659965	660325	659965	660325	292190	76240	1042109	982385	1026316	1064673	1071841	1065662	1031889	1010035
	33	1166903	1226218	833991	827072	411794	121500	1120941	827072	1175364	1165646	1156899	1156899	1184138	1202500	1166415	1207641	269445	330612	331257	329369	328405	324239	327998	332591	328350	329089	333264	313339	288975	302825	972292	968254	885806	635776	636846	638995	635185	636846	284678	72443	997575	957352	987026	1045189	1064674	1026304	999247	991604
	34	1137570	1190933	821816	819813	401681	116082	1078816	819813	1149840	1142352	1122551	1139809	1175750	1177804	1136629	1183856	265978	324618	324832	321768	322977	316336	321205	326617	323938	321982	326227	303841	282029	294111	964626	961529	871966	609401	614711	615401	608109	615401	275828	68763	957472	926154	953967	1020282	1025899	999210	983863	962858
	35	1103285	1153249	792973	791539	393162	111476	1058734	792882	1102151	1122834	1096360	1110053	1148734	1166192	1118814	1154604	259711	316031	319115	313932	313736	308469	312245	320465	314190	310587	317847	297988	273418	288089	940033	943697	849698	594165	595719	596235	591897	596235	267041	65053	941211	890544	929348	987089	1007309	959158	975881	947877
	36	1090149	1114183	782401	774939	383921	107154	1031324	779915	1070594	1091563	1081054	1076135	1135554	1142037	1094654	1134056	254499	309662	310201	309539	308759	303174	304976	311891	305524	298112	310587	288737	266458	281051	930954	931968	831894	575416	579548	581448	574601	579548	259835	61710	907716	874836	905126	941814	973607	942380	957853	934220
	37	1076845	1097279	763621	758720	374953	103019	1023134	760907	1046326	1058091	1035625	1050225	1105147	1107556	1087210	1110941	245386	300038	301993	301825	299528	297864	297190	303454	299719	292791	299441	283522	259150	273014	918767	924966	812607	564509	564509	566579	563742	564509	251908	58033	888881	854256	888776	921758	954859	914834	921777	910413
	38	1045159	1048681	741296	739414	368260	99342	1009384	742578	1035125	1031057	1023105	1031081	1081054	1081054	1072281	1090242	240341	292607	293391	294703	288178	293865	292099	295576	294728	287018	294551	273127	251645	267118	905068	913180	794976	548630	549157	552761	546654	549157	247017	55140	865970	826002	877025	905126	929530	886748	905971	878973
	39	1008229	1027618	730461	730059	362304	95450	990107	733242	1017685	1017666	1006286	1009220	1062172	1061609	1040409	1070602	232212	282454	286052	286400	279507	287231	286057	290447	289703	280654	289264	266978	245847	258650	866589	889607	787069	539135	539135	541864	537492	539194	238853	51209	850719	815886	856643	886746	904083	872114	879720	865482
	40	957699	1002549	713316	713316	353326	91641	953836	720212	985963	987207	972556	983370	1035091	1036059	1027994	1035897	226517	275000	276644	278396	275864	278934	276259	284952	283965	273549	285904	260183	239419	253362	850702	855981	764432	531839	532097	533520	527123	532656	231668	46116	834171	807459	839744	868596	877031	858990	866657	850128
	41	934959	983554	696055	697184	345212	88073	927939	704555	943570	968120	953875	956751	1021994	991103	977829	1011271	219916	268408	270436	273563	268721	271917	269701	275153	276961	264513	276240	256428	233615	248389	827759	841366	758519	523098	521961	521961	521961	523572	227981	41975	825516	793909	814583	854270	856010	832574	859161	832451
	42	925691	964417	688281	689675	338490	84659	915853	689675	914955	931833	926254	917003	984281	943019	957713	986066	214129	259603	261715	266807	261330	264305	263086	268438	271259	259324	267679	249078	228642	243960	798889	824876	746467	506716	506845	506845	506845	506845	222424	37002	807471	781341	796327	834168	843344	815848	832460	824029
	43	905461	952071	676482	678267	328791	81098	884676	678267	905578	914955	907989	904977	967481	926237	935365	967481	207962	252993	252993	258997	254907	258761	257054	259459	262455	253100	259703	243945	221726	239116	772360	797111	726301	497757	498053	497000	498053	499891	216565	31707	787393	745481	773400	823204	818760	793948	815416	801863
	44	880921	934094	660653	662240	319085	77253	871082	663110	897194	901289	900280	893869	944188	908004	923258	926387	203831	246057	246114	250404	248129	253481	250524	251452	255275	247422	253483	240569	217546	232969	760220	771600	710382	488193	488633	487407	488633	488633	213132	26925	769994	718859	758803	800449	793887	762066	793038	792612
	45	856539	910889	641884	644877	310639	73599	843957	644877	861338	870817	889933	868384	922729	897208	909625	916671	199802	241748	240670	245625	241816	248129	245048	246903	249750	243072	248499	233870	212731	227009	744335	757518	703759	477419	479195	477419	479512	477934	207759	21982	752723	696962	739606	780164	762899	736995	760668	758061
	46	844273	897890	627645	630795	304097	70182	816141	632058	849119	848534	855453	852585	916671	882607	874347	883061	194828	238363	236024	240771	238492	241012	239324	243329	244781	239778	244238	230080	207838	221298	733977	741509	688718	469683	469683	467929	469871	469871	201625	16230	726610	686924	731414	762043	752688	730782	736663	743730
	47	829951	856090	590409	595287	296700	67802	798161	601312	826888	824670	840887	828217	889361	843755	856472	868342	192050	232781	230918	235888	232605	236629	233534	237739	241846	235249	240019	226160	201281	216372	709699	726893	682312	459537	459564	459564	460349	461405	197515	4442	693308	674310	705009	744819	734855	717372	725979	734430
	48	821563	846526	581318	582581	288876	65361	786641	582581	816551	806665	827432	819933	870780	833568	844264	837861	186970	228246	225411	230172	227636	230293	228662	234634	235473	229081	235276	219945	197850	211147	698317	702867	667883	453064	453114	453378	453378	454247	193366	0	674187	655348	693308	726610	717372	698472	706545	715982
	49	809926	817639	572659	574933	282567	62424	779445	574933	795122	791820	816551	808285	835456	822521	829951	822528	182391	223662	220147	224871	221628	225312	222595	229782	229237	223603	231350	215455	193696	206857	671682	678722	647858	445971	445971	448678	447927	450684	188699	0	662604	649601	682984	696795	698472	688218	695282	698994
	50	795406	794941	559330	561548	275351	59022	766803	561548	785470	780049	795049	792985	825476	808652	817419	809429	178604	219066	216041	219774	217887	221435	218213	223479	226569	219267	226298	210499	190353	201484	656480	660653	640951	434505	436672	437170	437170	439084	182706	0	649576	636311	667760	674187	683765	671462	682122	688397
	51	782783	777447	546899	546899	270177	56297	747601	548638	774163	766803	780044	774302	820579	785458	812157	795536	173202	215491	212449	216012	214837	217873	214942	219433	221923	215554	220742	204578	184932	197316	642681	643091	634111	423692	426853	427154	423692	427138	178284	0	636869	626251	653402	662604	670029	651353	658437	672171
	52	775962	764535	538975	538975	262312	53287	726754	540059	754823	757453	769791	760647	808652	774229	794983	782782	168054	211909	207474	212036	209663	214541	210895	216213	218241	210207	216292	199480	181305	193294	633527	638784	625614	414251	414356	414356	414356	417803	173533	0	626773	615978	635179	652204	658438	625068	648992	658437
	53	769899	743882	527660	527542	256943	50057	714914	527660	742362	742561	757508	750639	794470	764717	782782	772668	163727	206956	200973	207380	206542	210370	206699	212697	213995	204867	211833	195361	176474	187786	626588	627498	609640	404207	404207	404849	404933	404933	171290	0	607357	588053	609195	636311	640773	608615	636305	642139
	54	760614	717432	521763	521374	248409	46117	707178	521847	720511	722667	743464	729527	781033	754847	772452	745600	158050	201346	196642	202775	201155	205962	200869	207452	209205	198798	205698	189491	171177	183519	601743	602972	595197	396539	396539	396905	397467	397467	167007	0	596644	574920	601326	626253	613993	598087	622081	623233
	55	734136	694672	508458	506085	243625	41643	695965	510039	712513	714573	729527	717887	757064	737165	760776	732680	153433	197713	193294	197834	194864	201358	196540	202474	204736	194691	200943	184696	166448	179946	590674	596039	576018	389432	389726	390951	390951	390951	161793	0	581184	557496	584547	606811	598429	583970	597463	597888
	56	716502	688355	497288	495980	233559	36720	680028	500021	693708	698627	713988	697430	740913	716532	740957	711712	148525	193273	189586	192864	191265	196419	192523	197121	199661	190185	196017	181101	161368	175370	579429	580358	563634	381692	381912	382102	381912	381912	158831	0	569842	551735	579289	587775	580720	572446	582339	585623
	57	696594	681456	485068	485068	228241	31099	671774	489211	680345	680885	693708	686999	723167	697500	718112	695662	144693	189561	184369	189881	188714	192297	188972	192921	194933	184410	192295	177131	157213	170217	574706	578058	556776	366713	368305	374093	368305	368305	153974	0	557637	532184	563438	579029	567606	564272	566090	567057
	58	685437	652410	471527	471527	224161	26574	662007	478406	671722	673263	682316	675852	715252	694353	696198	690791	139926	185342	180203	185366	184719	188822	185366	188459	189549	181191	186640	172784	151852	164877	555987	565451	540451	363429	364018	364117	364018	364018	149307	0	541076	516538	545083	566044	560160	541789	543951	542466
	59	676100	632996	462413	462524	217521	21546	646035	464827	662281	664598	675841	671389	695329	681704	685566	678201	136033	181113	176019	181298	180518	184988	180181	183998	185416	177004	182765	167754	146728	160890	545137	549491	525906	352773	353055	353883	353055	353055	145393	0	527149	508482	533105	545090	538883	528289	533304	533304
	60	663762	611427	457242	457242	212108	15282	627566	458823	651265	643502	670026	654906	678932	670026	665074	663759	132546	175965	172000	176386	175622	180122	175832	180308	181910	169816	179207	162163	142132	156221	537048	537946	509523	346027	347676	347809	347809	347809	141138	0	517554	494424	522204	533105	526620	519958	520039	520073
	61	647751	601148	451508	447404	205681	0	614465	453579	630296	623430	642138	646035	664413	637637	658463	639804	127920	169452	168236	171881	171794	176260	172498	176836	176863	165165	173130	158384	137857	151983	529048	530406	492077	333930	333930	333930	333930	333930	136302	0	510114	484987	516957	522712	519954	515350	513690	515350
	62	628651	585471	439116	439279	200110	0	600709	440215	621922	612424	635124	628194	639641	630296	643296	625599	124946	165889	164829	167663	168084	170806	168093	169866	171697	162147	168932	155449	134649	147698	517935	523199	482489	328751	328751	328751	328751	328997	131517	0	495678	474634	504555	516706	511978	501814	502337	501387
	63	611423	575259	430330	431134	197243	0	592056	431543	601030	599672	623524	621176	627707	620114	628651	606511	120775	162146	161317	164271	164573	167239	164217	164713	167196	157796	164523	151472	131181	144255	502414	504066	470292	323257	324347	324347	323257	324347	127703	0	484777	467659	489278	502363	501301	486620	496462	496180
	64	596893	562281	418191	418391	192160	0	586395	418730	596116	587790	607441	609373	613549	607197	613096	589993	117403	158437	156996	160876	161259	162258	160440	161368	163499	154315	161282	147309	126977	139540	488668	493305	453216	317735	317735	317735	317735	317744	123734	0	474643	455300	480186	491363	490483	474667	481289	484188
	65	587734	546956	409646	410166	187430	0	570292	410166	587381	580748	598436	596116	599697	598749	596893	573689	114231	154615	154296	156999	157579	158328	156755	157894	159591	150888	158261	143726	123145	136063	476524	477585	445937	308058	308058	308058	308058	308797	120010	0	464510	447144	463688	480186	480890	461325	467602	473099
	66	580515	533341	396362	402588	181863	0	563945	398270	572282	566186	588077	584412	587426	588082	587399	564067	111001	149808	149997	153454	154322	154104	151763	154480	155963	148718	154437	139584	119828	132182	456578	461368	437196	301290	301290	301290	301251	301290	115471	0	451876	441783	451980	463747	461441	450706	461441	463654
	67	567666	516440	388783	392361	177638	0	550629	391393	561506	550629	584404	570054	567665	575460	575026	552991	107320	145787	146266	149532	149522	150028	149033	150825	151612	145747	150457	136379	117046	128198	448219	448740	429610	296013	294716	294716	294716	296013	111636	0	445268	428337	444377	450021	450706	443706	451980	450481
	68	559679	509584	378713	382683	173203	0	540956	378858	548454	542883	564318	557594	552987	557414	559769	545280	103471	143047	143485	145298	144891	147068	145031	148317	148815	142367	148016	132237	113516	125794	435671	437204	421191	285981	285626	285626	285575	285626	107970	0	435665	424036	435002	442662	443706	429051	442132	443037
	69	550081	502821	373992	375699	168674	0	519770	374785	539639	529128	548060	545726	544228	547532	550627	538782	99780	139210	139336	142337	142890	142982	141708	144383	144838	139111	144383	128522	110233	122505	425675	428060	412378	278312	277579	278312	277579	278470	103980	0	424167	415196	427355	428274	426663	421925	427355	428552
	70	537323	482667	365923	368496	164626	0	512141	365144	519770	513987	538065	531096	537547	530765	536294	529329	97170	135307	135736	138563	139210	139730	138171	139519	140083	134199	140061	125857	106840	119027	414640	421033	397795	271360	270061	271113	271113	271360	100287	0	413302	404342	417497	422130	420166	413656	420829	421001
	71	530731	476281	359676	360633	160208	0	494923	357723	511873	500232	521378	519770	526914	519770	529262	518576	93566	133062	132816	134611	135068	135813	133942	135829	135865	131025	135801	121972	104393	115051	404915	405719	392204	264247	262637	264146	263428	264247	97435	0	405612	393667	406833	412071	412791	405555	411169	414948
	72	518592	470377	352240	351817	155638	0	478838	350755	489045	483066	511040	502378	514730	508221	515876	506167	90562	129651	130396	131626	132067	132330	130839	132493	132509	128334	132237	117635	100036	111630	398102	399192	382193	258004	257943	258502	257943	258419	94655	0	392067	388349	398219	404342	401749	396422	405057	406825
	73	510914	461379	341304	341282	151724	0	469153	340554	478333	472437	499282	485918	495795	495795	506167	494499	87637	126447	127628	128070	128413	128809	127095	129175	129289	125566	129144	114463	97407	107843	388800	390964	371125	252609	252479	252609	252609	252936	92247	0	386153	383297	388752	391076	391318	388172	398119	401639
	74	498395	452840	334309	332102	148573	0	459200	332094	468276	464556	483574	476067	483570	484393	494499	478247	84554	122793	123672	125373	125681	125689	123667	126800	126374	122181	126217	111003	94348	105128	383038	384210	360131	248511	248095	248511	248095	248874	89778	0	376232	371329	382752	382826	381901	377867	387513	390671
	75	489480	445839	323152	322976	144322	0	450513	322976	458059	453941	472487	467557	470646	474302	480469	465775	81342	119022	120164	121744	122391	121438	120818	123081	122430	118030	123081	108351	91409	101805	375022	376363	353803	241696	240987	240987	241044	242215	86623	0	368861	365502	371025	372557	370816	366319	380783	380899
	76	475187	434315	312736	311993	139905	0	436227	311740	450119	443608	459547	457344	458773	465828	469274	457091	78947	116675	117336	118480	118389	118171	117838	118558	118055	114361	119022	105442	88417	98330	366112	367689	342282	232856	231673	232574	232574	233251	82884	0	356662	353685	365644	362729	363066	358124	370087	372587
	77	459429	429837	306258	305840	135734	0	421370	304363	431985	431985	447295	443266	445739	450125	458458	442513	76420	113507	114057	116233	115248	115095	114279	115251	115035	110313	115555	102716	85811	95322	358576	360051	336418	227028	226648	226746	226746	227068	79850	0	347757	343915	355919	351603	352747	348411	362254	365333
	78	446206	411189	298255	298255	131182	0	412590	297569	420445	419912	433822	430561	430221	435095	439468	426273	73448	109546	110492	112293	111979	111277	111309	112029	111469	107570	111973	99915	83103	92767	346461	348315	328028	222290	220366	222498	220824	222611	76303	0	336847	332094	343904	341083	341890	337630	352747	357389
	79	429877	401132	292456	292456	126756	0	399622	291262	406759	413190	420447	415011	416751	418076	423398	412142	70488	106948	107293	109358	108880	107776	108717	109057	107381	104858	108717	96098	80150	90397	341832	342882	321278	213783	212273	212903	213783	214603	73933	0	326508	324246	333649	327826	333269	326247	343902	349091
	80	413196	392768	286329	286329	123524	0	390617	286204	395732	392355	397871	398883	402856	408976	408006	402634	67820	103592	103705	105681	105364	104708	105451	105216	103999	101632	105207	92672	77107	87202	333914	336216	313347	208100	206819	207266	207510	208713	71333	0	320585	317467	325419	321049	326621	319772	336004	340959
	81	404340	384633	275611	275414	119103	0	380823	275611	387421	385017	387376	390716	387363	387932	400591	390098	64529	100874	101324	102633	102395	101897	102239	101641	101252	98917	102168	90285	74891	83286	330438	330666	307091	203588	202992	203285	203588	203857	68622	0	313224	305848	318716	312894	318992	308912	328336	332080
	82	394969	374363	269819	269819	115555	0	370116	269578	376300	375038	380221	380823	376857	378209	388420	381409	62298	98282	98616	100211	99411	98445	98785	98353	98197	94974	98704	87058	72323	79895	323285	324170	298007	199153	198062	198165	198509	199689	65498	0	302278	297947	305489	303723	311689	301974	320593	321940
	83	382552	363019	262635	262635	111978	0	363047	260551	364889	366206	373699	373699	367491	368742	379787	370979	58978	95710	95404	96322	96150	95733	96124	95544	95198	92305	95474	83575	69832	77367	316552	317452	290857	194835	194421	194430	194683	195596	62149	0	292348	292348	300093	295333	303979	294029	312865	316539
	84	375794	354776	254248	254198	107837	0	353409	253220	351212	356005	363268	363419	355258	359470	370992	363677	56141	93375	92460	93939	94014	92776	93603	92607	92583	89291	92767	80675	66698	74629	311806	312168	280690	189684	188931	188932	189237	189842	58963	0	284567	285248	291235	286422	293933	287671	304685	305728
	85	369870	346511	250170	249598	103506	0	338755	248883	342980	345200	350727	349484	346556	345341	364039	352068	53255	89966	89377	91471	91212	90478	91294	89996	90084	85916	90084	78215	63751	72125	302282	303154	275252	185593	184569	184569	185477	185548	55741	0	280499	280499	283450	281779	285883	283086	297872	293933
	86	361442	339993	243332	242933	99280	0	329855	242602	331794	333944	343773	343559	339175	338873	352221	346435	50363	87712	86951	88856	88428	87797	89166	87301	87653	83442	86793	75158	61237	69470	293241	292809	269460	181081	180528	180528	180645	181081	52796	0	268003	271848	277541	273316	281292	276513	290106	285883
	87	352726	332843	239282	238976	95539	0	320679	238328	322166	325931	334081	331931	332783	329849	346905	339253	46969	85172	84613	86186	86179	85590	86615	84816	85472	80416	84060	72980	58772	67134	287500	286053	260023	177750	176609	176354	176794	177750	49755	0	259555	259772	269232	263117	275183	270224	281769	280022
	88	344420	326812	231746	231746	92225	0	305979	231539	315406	318695	322662	322565	323836	321531	341355	333225	43747	82770	82174	83716	83645	82865	84283	81524	82819	77565	80635	70982	56195	64691	279103	277944	250427	172125	171265	171059	171688	172125	45231	0	251961	249905	262160	253383	266408	262401	274436	272852
	89	335656	316369	226661	225875	87631	0	301202	225821	305677	308990	315822	315552	314890	312367	331585	323824	39678	80168	79529	81034	81053	79933	82066	78711	79934	74921	77787	68494	53506	62217	270851	269832	245799	166151	165600	164844	165600	166151	40689	0	245577	244674	251837	248314	259536	253367	266644	264977
	90	328889	310278	221315	221165	84905	0	292383	221165	296201	301109	304208	307332	305025	302992	320683	315581	35500	77971	77206	78501	78855	77671	78860	76186	77291	72547	75255	65922	50898	59601	262835	262199	237813	160555	159457	159457	160067	160438	33941	0	236245	236001	244442	239522	252228	248328	260938	259536
	91	316082	301023	215630	214784	81124	0	284689	214784	286180	290099	296167	299372	296167	292803	309088	305025	31766	75639	75510	76512	76490	75408	76632	74105	75356	70105	72994	63085	48033	56743	258439	256216	230029	154605	153694	153694	153811	154605	27746	0	228060	226334	237130	231420	241831	239907	252525	249330
	92	306500	291581	208867	209064	77682	0	279439	208867	277287	282265	283095	284707	284143	283101	304232	296174	27642	73298	73102	74359	74393	73287	74864	71830	73023	67611	70747	61028	44086	54070	252474	251561	225985	150022	148810	148810	148810	149773	20409	0	220983	218932	229136	222724	235033	235160	239544	238180
	93	298908	284311	204212	204212	74123	0	269711	203903	267187	273558	276132	276132	275923	275881	295293	284123	23950	71063	70845	71837	71994	71120	72215	69686	70881	65500	68539	58124	40249	51121	243812	241928	218103	145571	144832	144876	144913	145571	11308	0	214173	213264	220996	214078	227382	226661	231013	230602
	94	288464	276445	196977	197368	70420	0	262771	196659	259195	264884	265634	266857	267347	266857	284949	277517	19735	68995	68967	69863	70030	68776	70082	67347	68459	62987	66030	55656	36527	47813	237850	236989	212882	141692	140824	140824	141091	141692	0	0	209554	208250	213878	209470	220994	219014	224432	224369
	95	281035	266524	191524	191577	66583	0	254360	191022	252435	254360	258710	261266	261410	261751	276590	269833	15200	66919	67066	67550	67679	66729	67899	65041	66145	60602	63351	53427	32379	43744	230891	229075	207234	137314	136074	136022	136189	137302	0	0	203110	200183	208221	204757	216126	214078	218259	218088
	96	273726	259006	183623	184206	63149	0	246852	184206	244946	248820	253014	253495	254367	254414	268220	262461	9085	65032	65099	65347	65555	64572	65448	62679	63682	58037	60940	50667	28913	39718	220282	217396	202045	133243	132199	131983	132825	133236	0	0	193861	191644	200863	196189	212794	206594	213593	214387
	97	264645	252006	177876	178504	59547	0	236360	178082	238709	240709	248565	248651	250292	250292	260075	254509	0	62636	62752	62283	63305	61906	62515	60055	60624	55719	58754	46809	25490	36606	212348	209315	195586	129091	128112	128040	128537	129091	0	0	188808	185246	194292	189821	204722	198657	205353	208635
	98	257758	246589	173272	173436	56011	0	228139	173436	231406	234348	242075	241915	244735	240300	252989	250683	0	60319	60607	60381	60882	59540	60319	57622	58386	53427	56141	43329	22076	32493	205766	203536	192071	123019	122321	121901	122463	123019	0	0	183188	180499	188518	183628	195079	192979	198554	200681
	99	251571	240470	169113	167891	53040	0	222381	169214	222213	226367	232174	234139	237448	235230	247635	244337	0	58253	58389	58291	58791	56737	57996	55209	55875	50899	53374	39718	17424	29473	198218	196502	186504	118770	117660	117084	118170	118906	0	0	178080	175052	183188	178314	191644	188265	192061	193114
[truncated: 979 more columns]
